# Supplementary figures and images for: The Comparative Analysis of Two RT-qPCR Kits for Detecting SARS-CoV-2 Reveals a Higher Risk of False-Negative Diagnosis in Samples with High Quantification Cycles for Viral and Internal Genes
Source: Hindawi journal article supplement (doi:10.1155/2022/2594564), 2022-07-05

## Efficiency and Limit of detection - Thermo Fisher

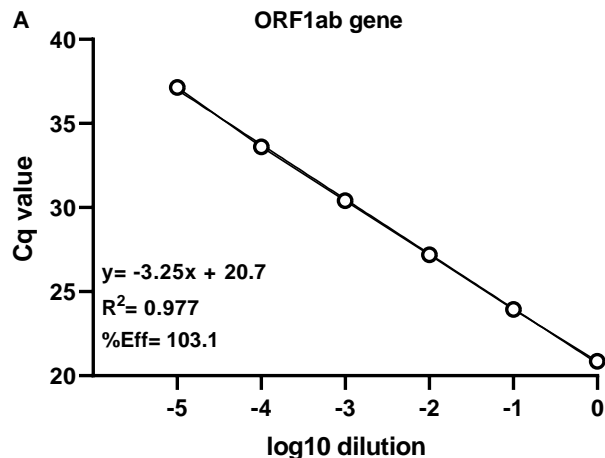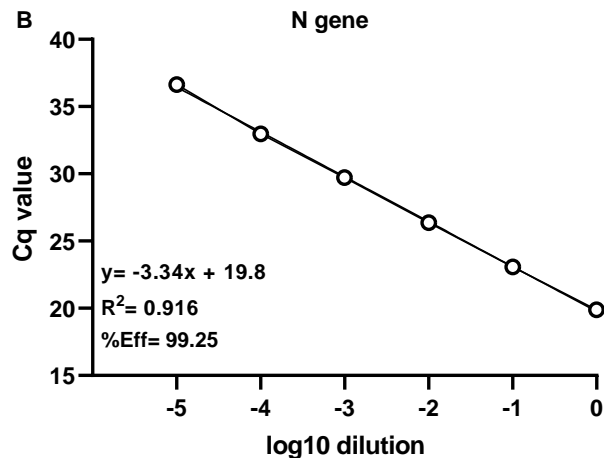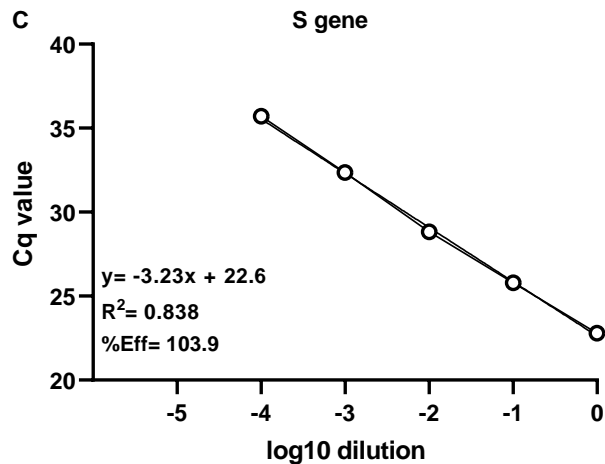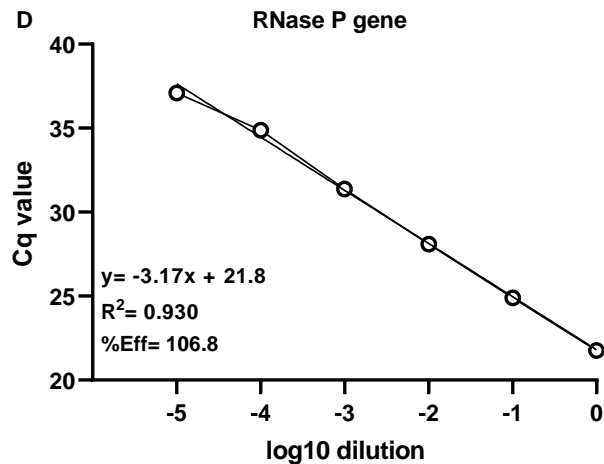

Supplement: f1 [file 2594564.f1.zip]

# Standard curve- Thermo Fisher

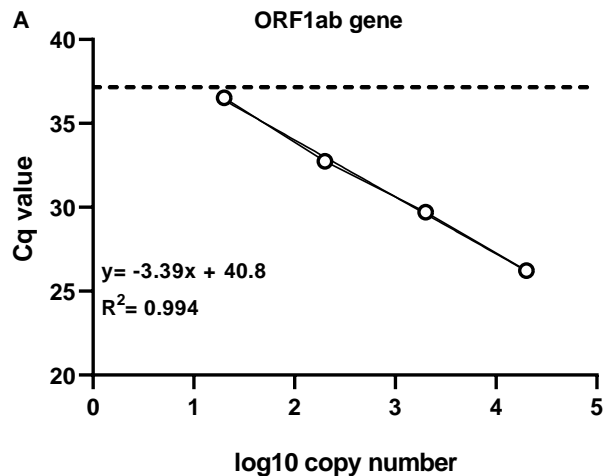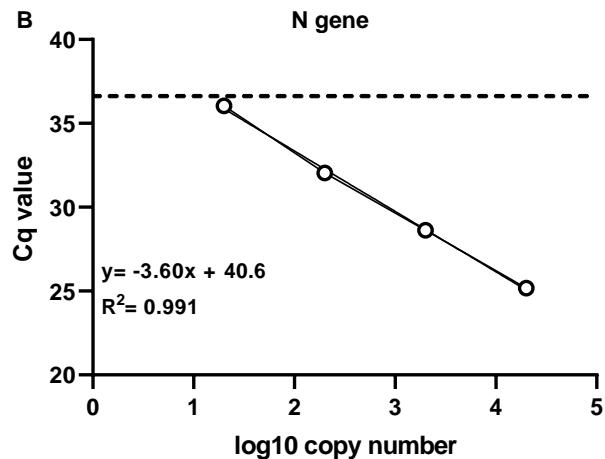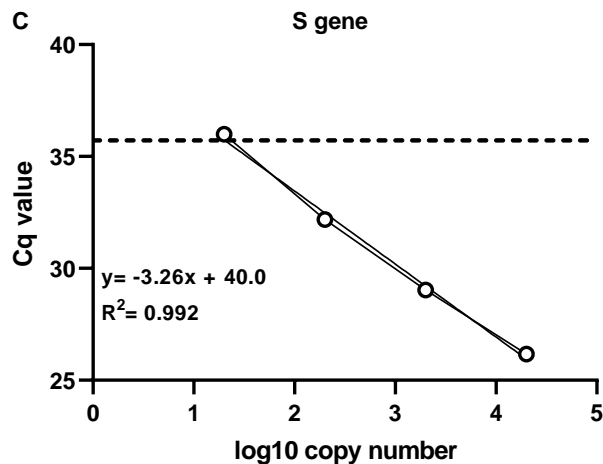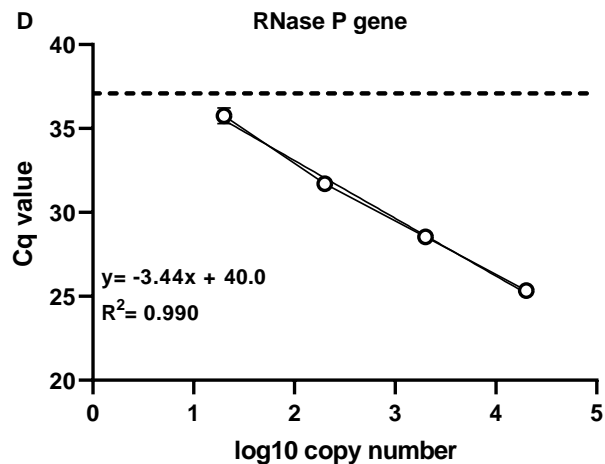

Supplement: f1 [file 2594564.f1.zip]
